# Supplementary material
Source: publisher figshare collection journal article supplement (https://frontiersin.figshare.com/ndownloader/files/23335652)
Supplement: Supplementary file [file 23335652]

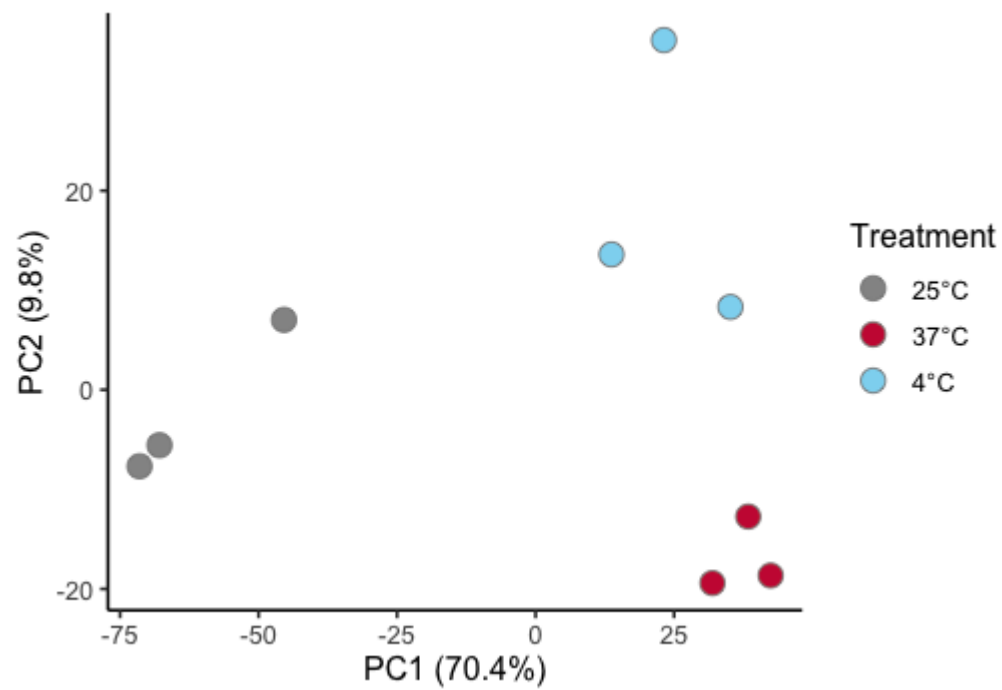

**Supplementary Figure 3. Principal component analysis of RNA-seq data.** The replicates for each condition clustered together, with the first principal component describing the majority of the variance (70.4%) and separating the control from the temperature stress treatments. The second principal component describes 9.8% of the variance.
